# Supplementary material
Source: publisher figshare collection journal article supplement (https://karger.figshare.com/ndownloader/files/27541040)
Supplement: Supplementary file 1 [file 27541040]

**Online Supplementary Material**

Table. Multivariate analysis of factors related to EVT performance

|  | Odds ratios (95% CI) | P values |
| --- | --- | --- |
| Tandem occlusion or Different territories | 2.3 (1.1–5.0) | 0.03 |
| Pre-mRS score | 0.77 (0.56-1.1)† | 0.09 |
| Baseline NIHSS score | 1.03 (0.99-1.08)† | 0.16 |

† When a continuous variable changes by one unit

CI, confidence interval; EVT, endovascular thrombectomy.
